# Supplementary material
Source: publisher figshare collection journal article supplement (https://karger.figshare.com/ndownloader/files/33004688)
Supplement: Supplementary file 1 [file 33004688]

**Supp. Table 1.** Primers for Vsub50 and Vsub400

| Repeat Name | Forward 5′ to 3′ | Reverse 5′ to 3′ |
| --- | --- | --- |
| Vsub50 | CCAAACAGTGAGACCAGG  (18 bp) | CAAGCAACCGCATCGTGA (18 bp) |
| Vsub400 | GAAGGTTGCATACACAAACTGG (22 bp) | ACACTCACGCGCATCAATCG (21 bp) |
